# Supplementary material for: Chitin Deacetylation Using Deep Eutectic Solvents: Ab Initio-Supported Process Optimization
Source: PubMed Central journal article supplement (PMC8025712; doi:10.1021/acssuschemeng.0c08976), 2021-03-05
Supplement: sc0c08976_si_001.pdf [file sc0c08976_si_001.pdf]

# **Chitin Deacetylation Using Deep Eutectic Solvents: *Ab Initio*-Supported Process Optimization**

Filipa A. Vicente,<sup>†,\*</sup> Matej Huš,<sup>†,‡</sup> Blaž Likozar,<sup>†</sup> Uroš Novak<sup>†,\*</sup>

<sup>†</sup>Department of Catalysis and Chemical Reaction Engineering, National Institute of Chemistry,  
Ljubljana, Slovenia

<sup>‡</sup>Association For Technical Culture of Slovenia (ZOTKS), Zaloška 65, 1000 Ljubljana, Slovenia.

\*Corresponding authors: [filipa.andre.vicente@ki.si](mailto:filipa.andre.vicente@ki.si); [uros.novak@ki.si](mailto:uros.novak@ki.si)

Supporting Information Contents:

Number of pages: 6

Number of Figures: 8

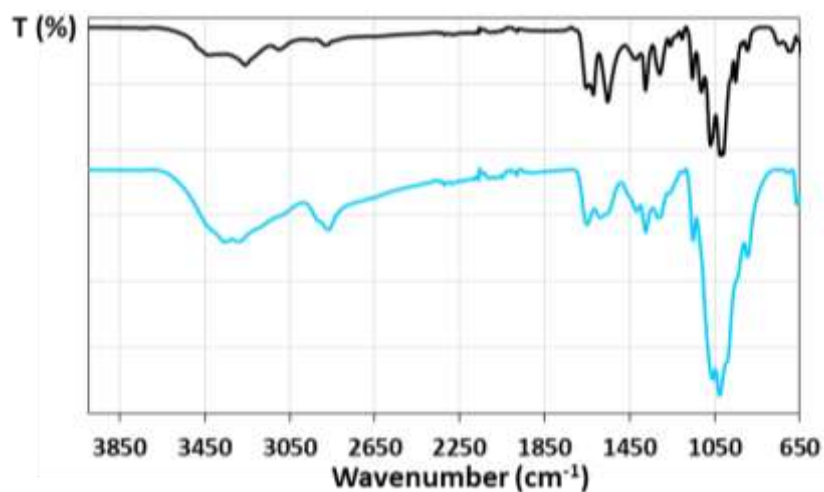

**Figure S1.** FTIR spectra of the commercial chitin (---) and chitosan (---).

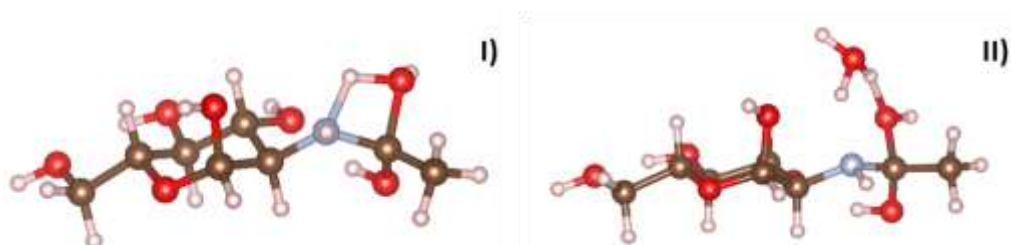

**Figure S2.** Two possible transition states for the additional of water to the protonated amide in acidic water solutions with (I) one and (II) two water molecules participating.

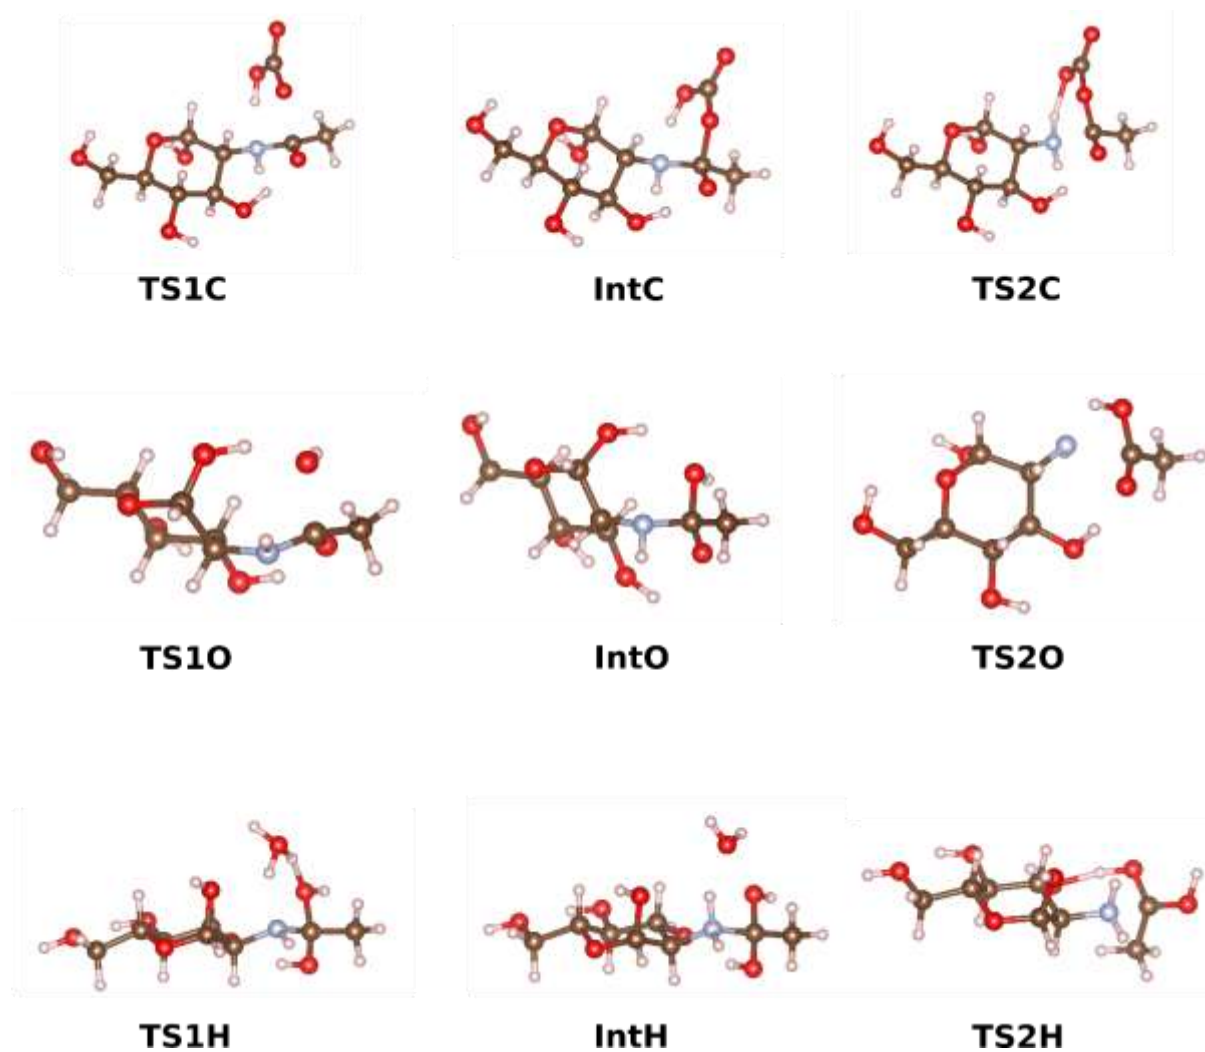

**Figure S3.** Structures of intermediates and transition states in deacetylation of GlcNAc with  $\text{H}_3\text{O}^+$ ,  $\text{OH}^-$  and  $\text{HCO}_3^-$  for the potential energy surface in Figure 2.

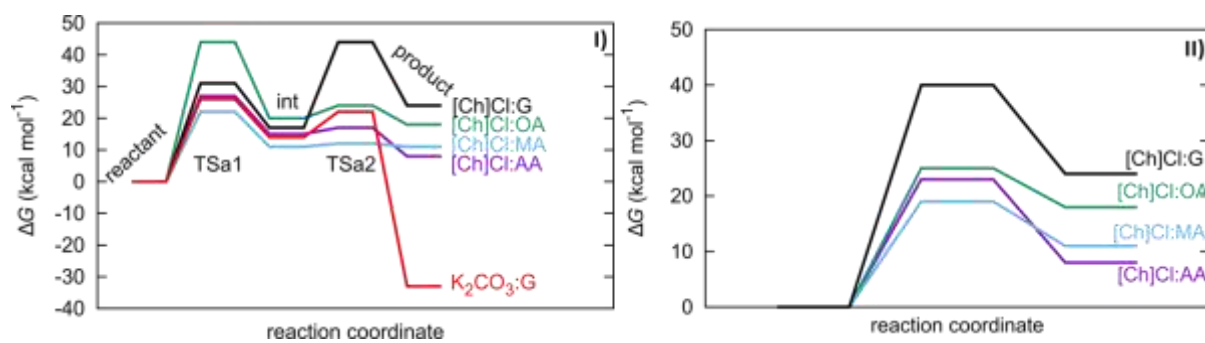

**Figure S4.** The calculated Gibbs free energies for amide hydrolysis with various DES (I), with a close-up in II).

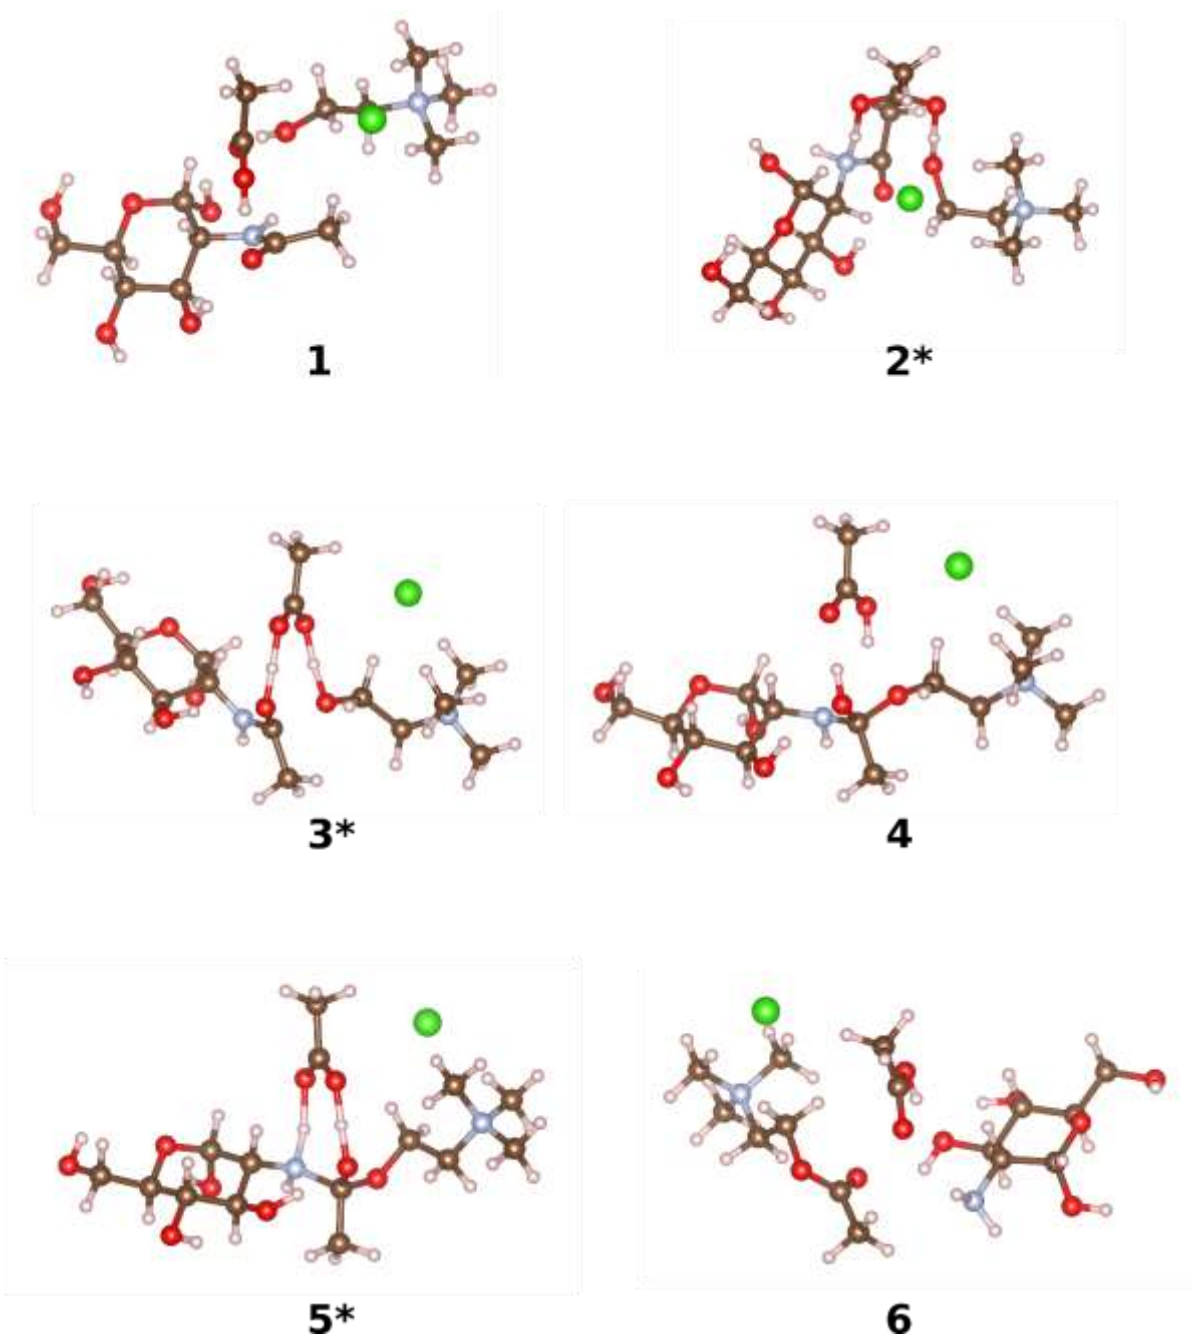

**Figure S5.** Structures of intermediates and transition states in deacetylation of GlcNAc with [Ch]Cl:AA, for which skeletal formulae are shown in **Figure 3**.

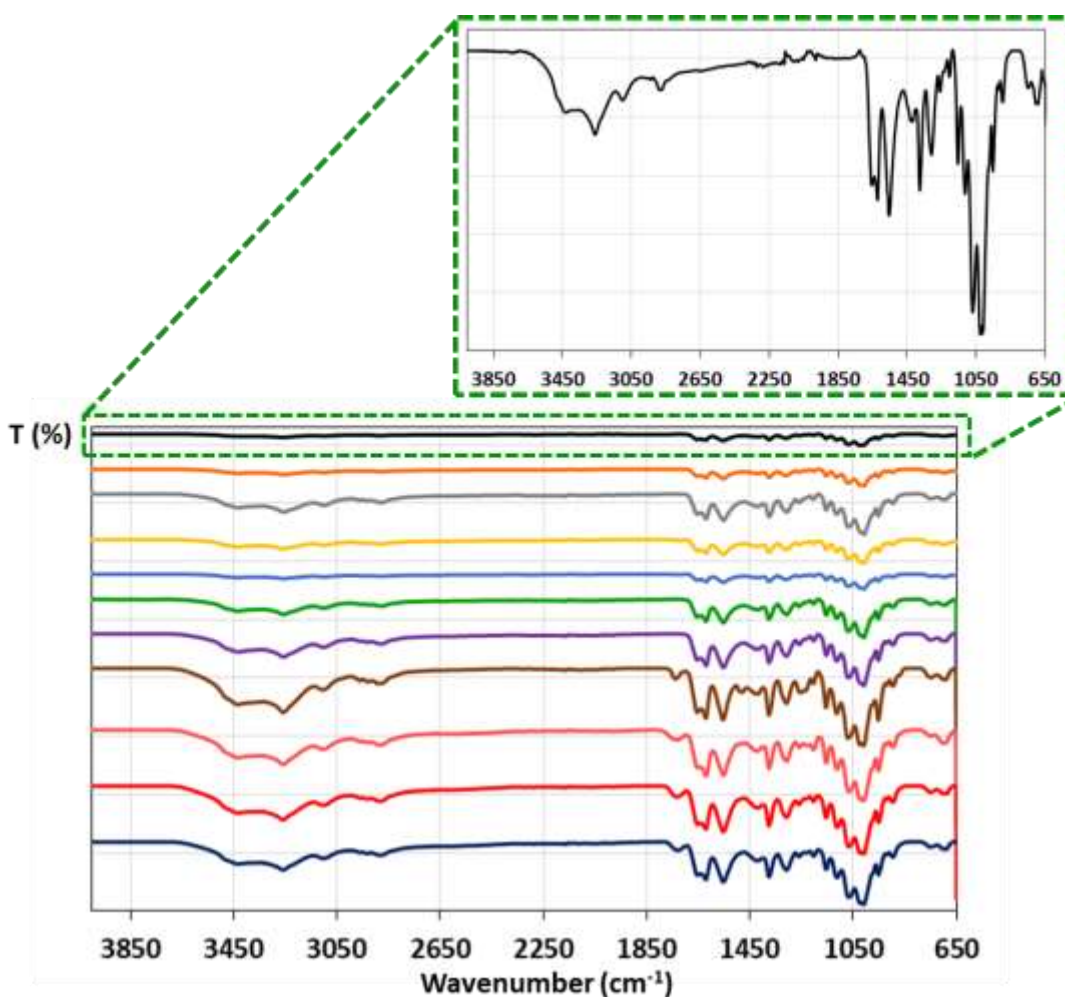

**Figure S6.** FTIR spectra of the DES screening upon its ability to perform chitin deacetylation at 80°C for 24h: ---, commercial chitin; ---, KHCO<sub>3</sub>:G; ---, K<sub>2</sub>CO<sub>3</sub>:G; ---, [Ch]DHC:G (1:2); ---, [Ch]DHC:G (1:4); ---, [Ch]Cl:G; ---, [Ch]Cl:EG; ---, [Ch]Cl:AA; ---, [Ch]Cl:OA; ---, [Ch]Cl:MA; ---, [Ch]Cl:CA. In the particular case of [Ch]Cl:OA, the deacetylation was performed at 80°C but for 4h.

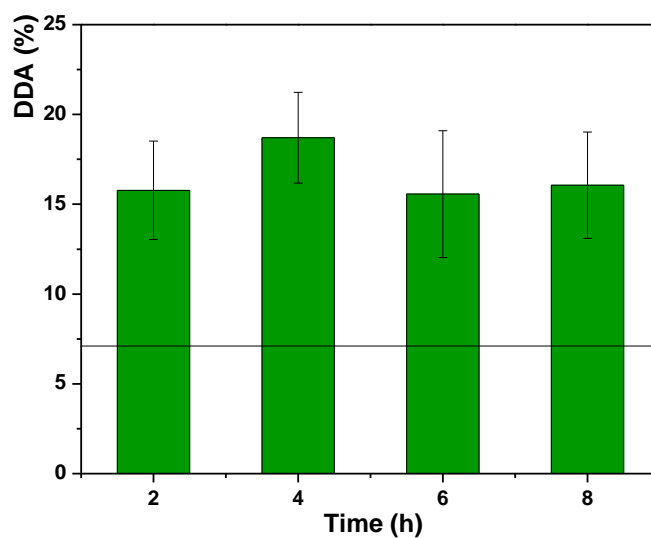

**Figure S7.** Influence of the reaction time on chitin deacetylation while using pure [Ch]Cl:OA at 80°C. Line represents the DDA of commercial chitin (7 ± 1%).

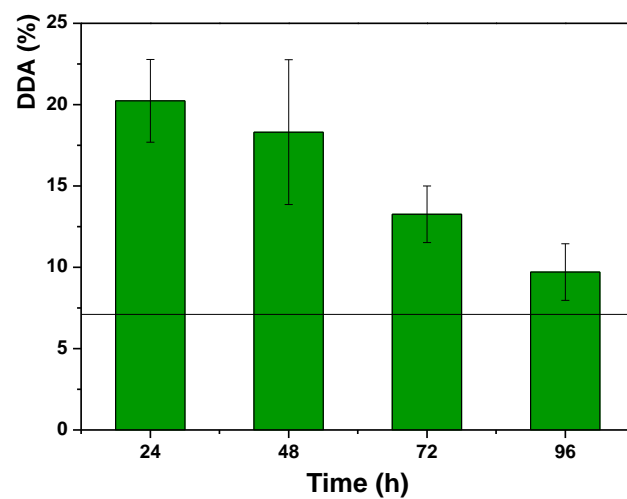

**Figure S8.** Influence of the reaction time on chitin deacetylation while using pure  $K_2CO_3$ -G at  $80^\circ C$ . Line represents the DDA of commercial chitin ( $7 \pm 1\%$ ).
